# Supplementary material for: Does Postoperative Oral and Intestinal Microbiota Correlate with the Weight-Loss Following Bariatric Surgery?—A Cohort Study
Source: MDPI journal article supplement (doi:10.3390/jcm9123863), 2020-11-27
Supplement: s1 [file s1]

## Supplementary Material

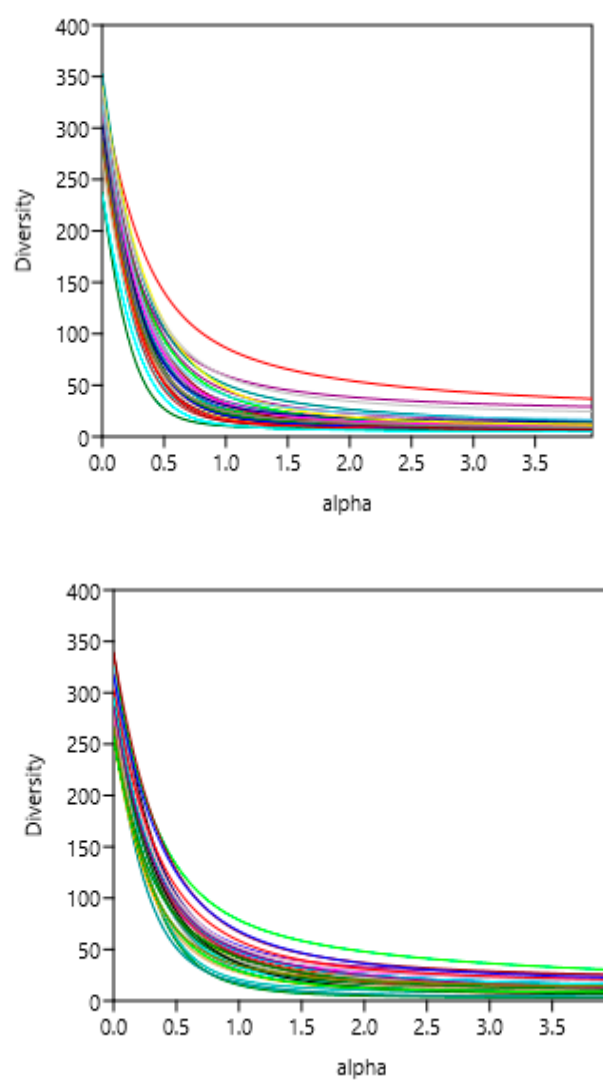

**Figure S1.** Alpha diversity for oral and intestinal microbiota.

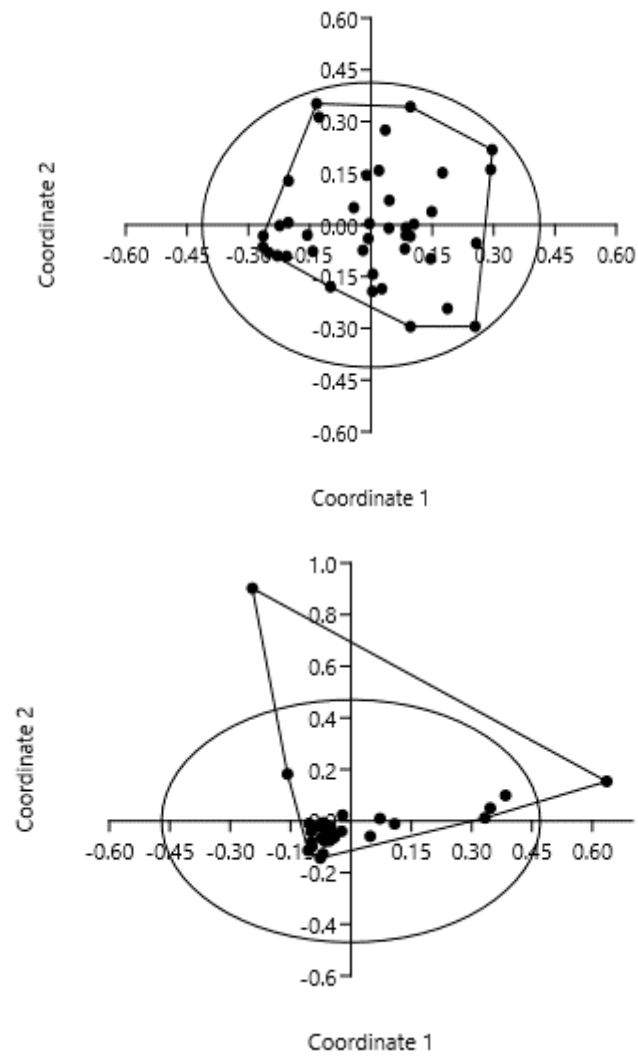

**Figure S2.** Beta diversity for oral and intestinal microbiota.

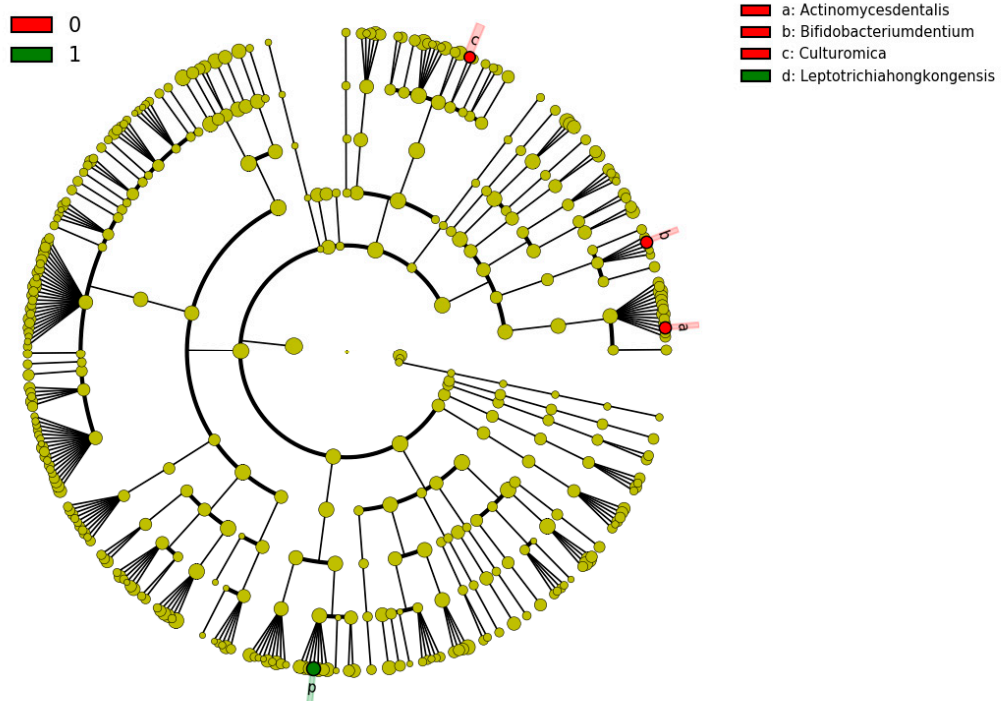

# Bacteria.Fusobacteria.Fusobacteriales.Leptotrichiaceae.Leptotrichia

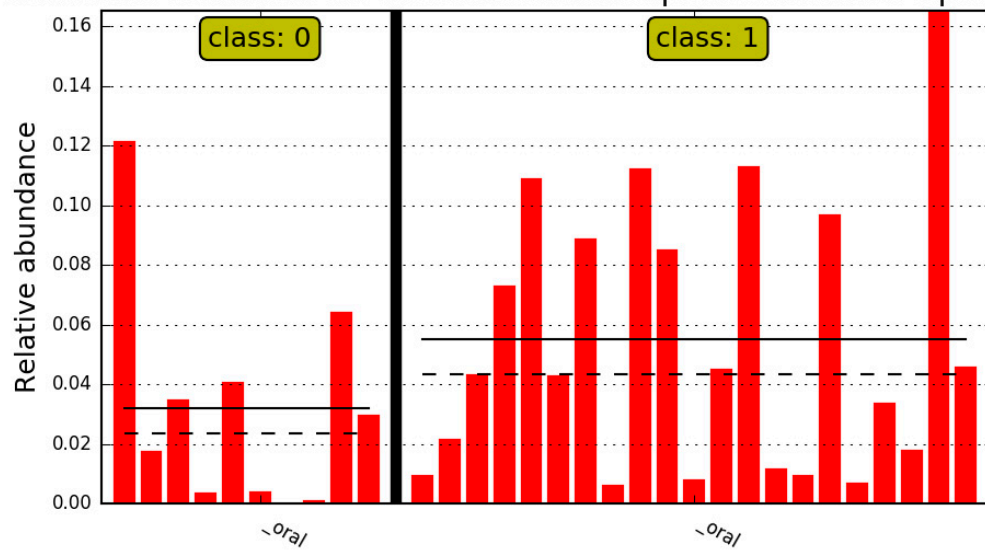

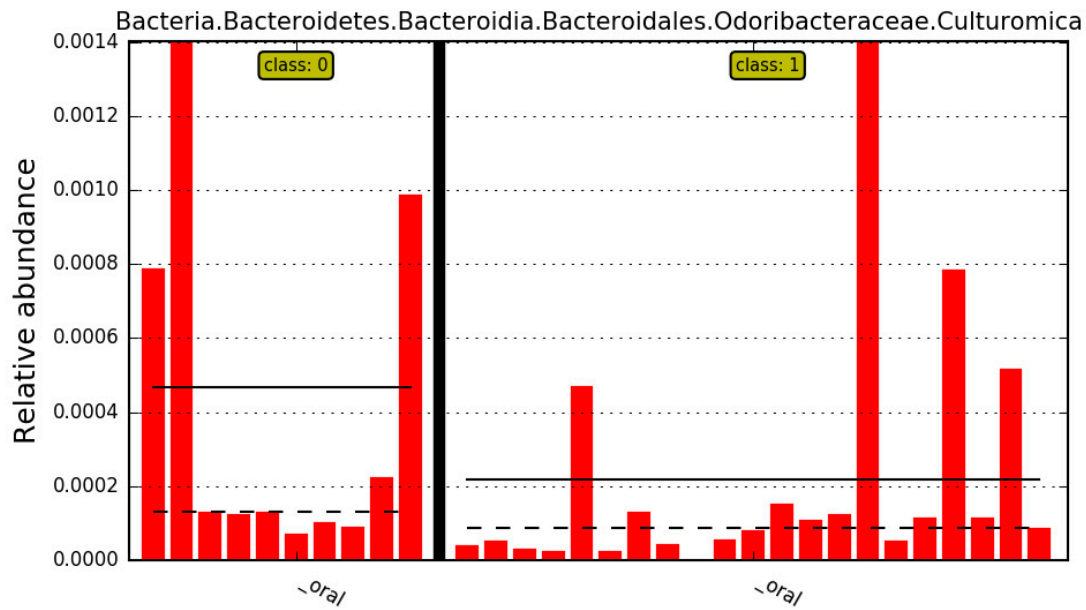

**Figure S3.** Differences in oral microbiota between Group 1 and Group 2 (1-Group 1; 0-Group 2).

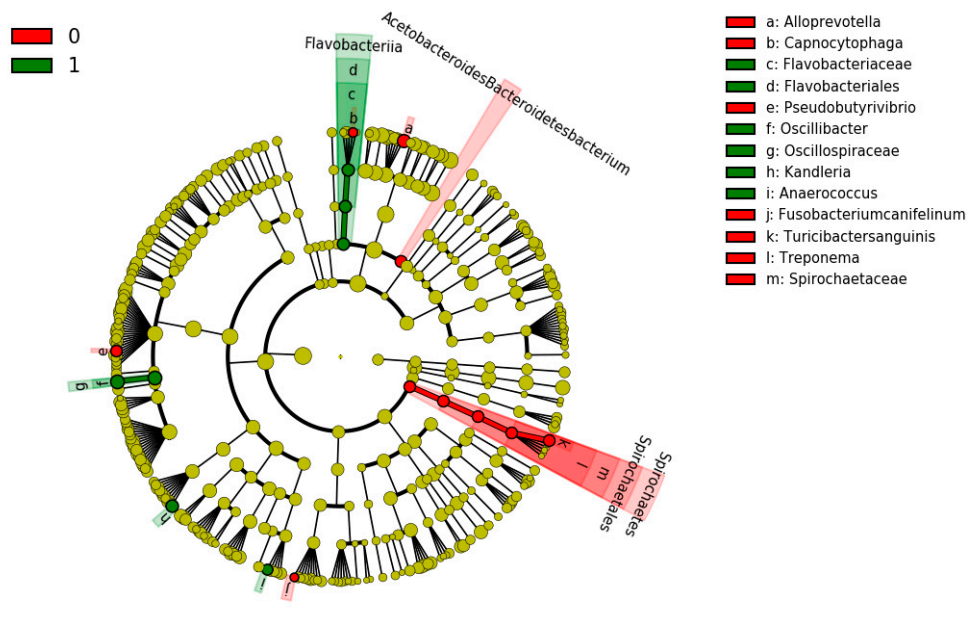



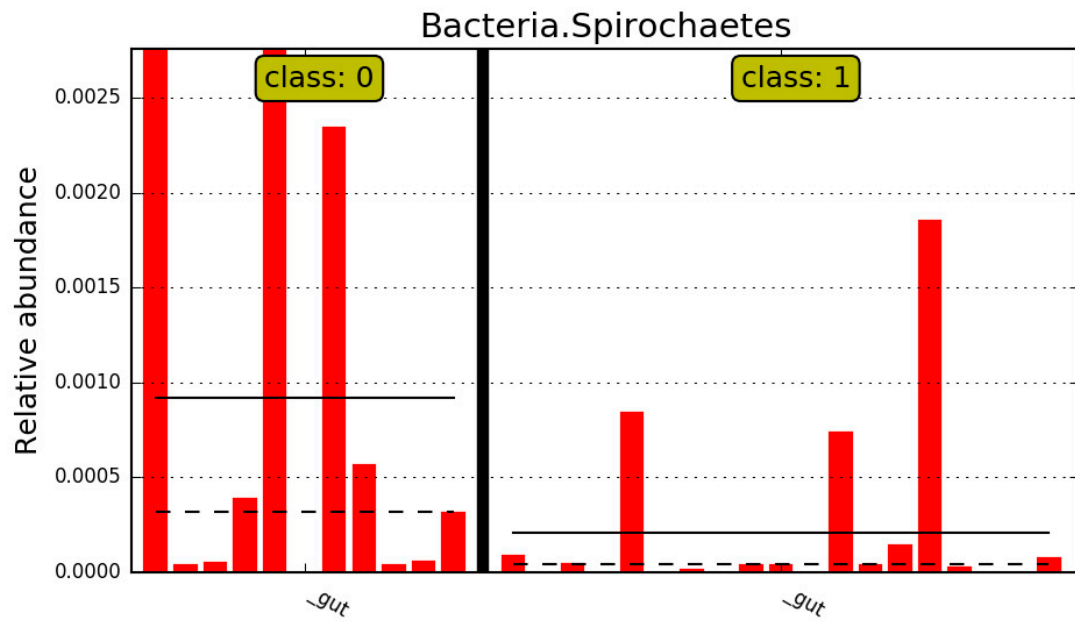

**Figure S4.** Differences in intestinal microbiota between Group 1 and Group 2 (1-Group 1; 0-Group 2).

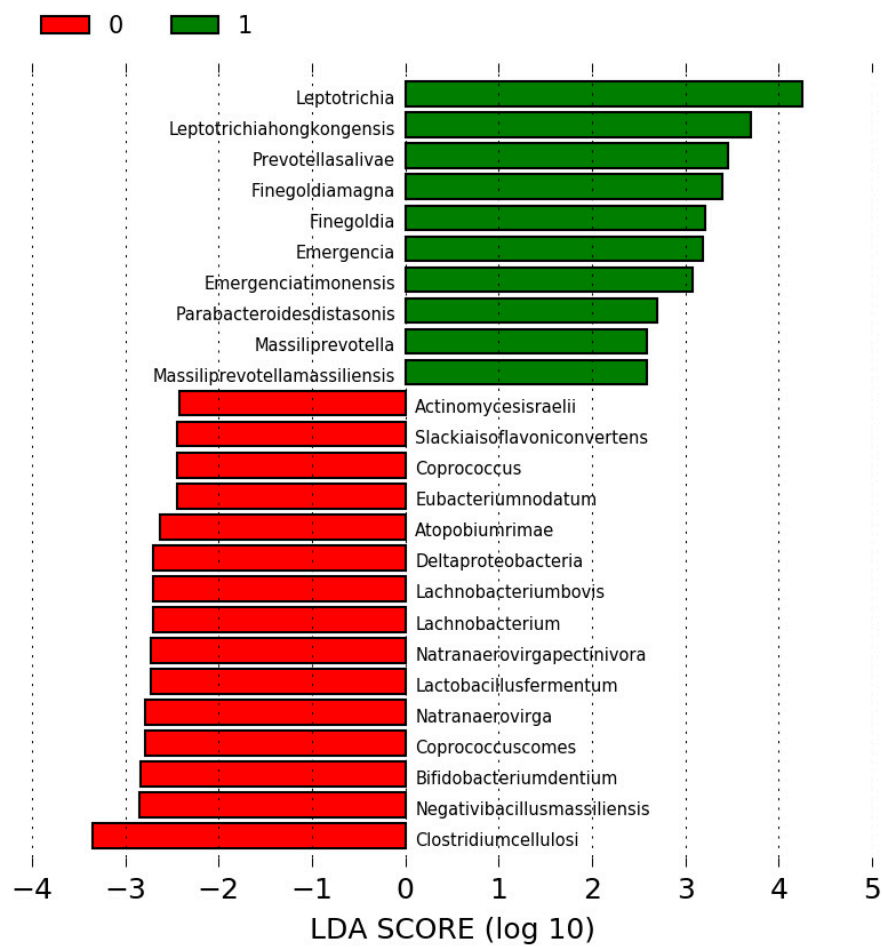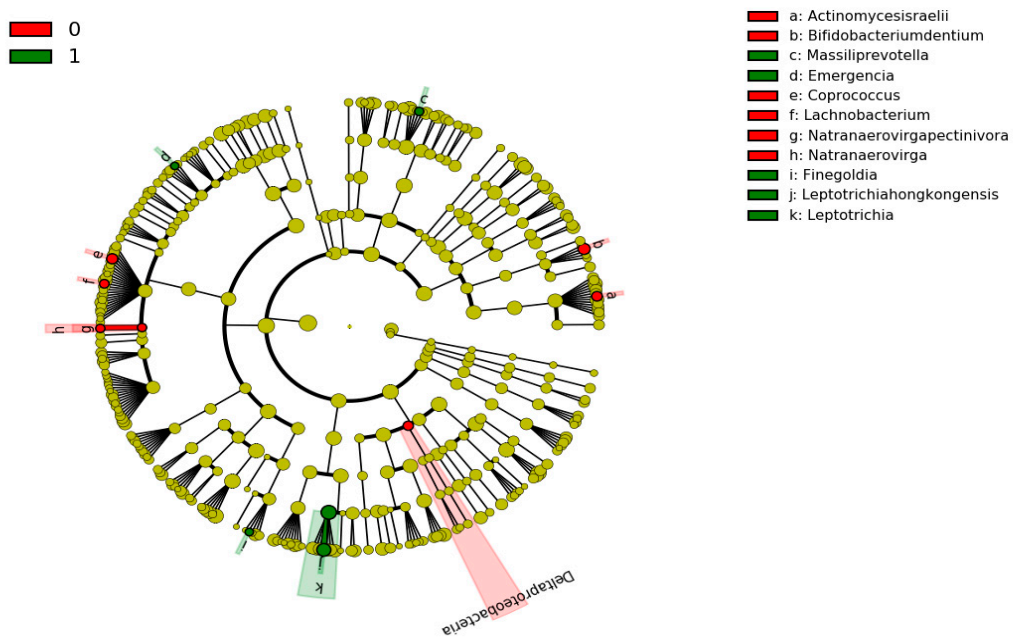

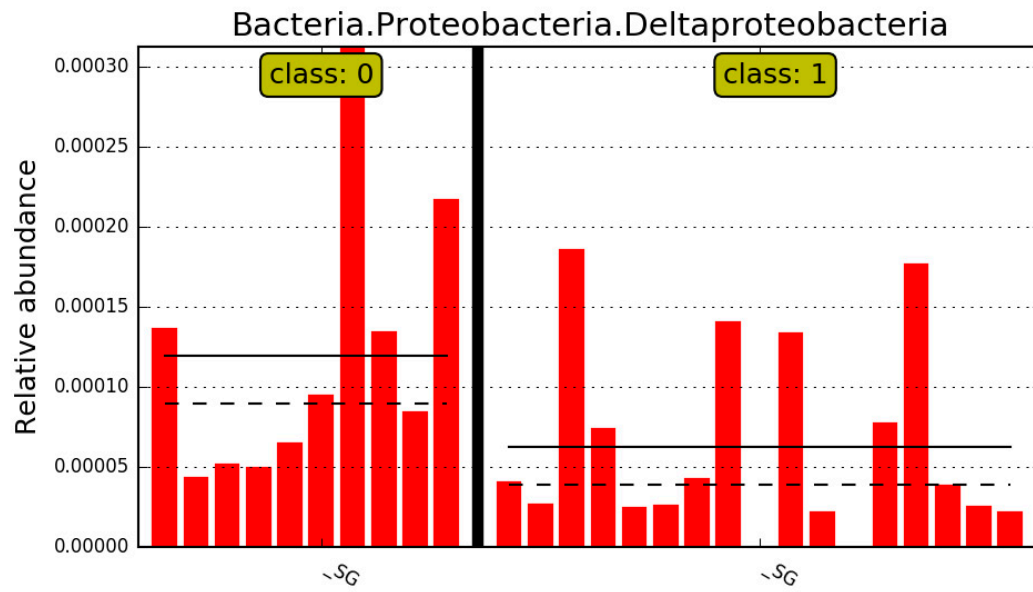

**Figure S5.** Differences in oral microbiota between Group 1 and Group 2 among patients undergoing SG (1-Group 1; 0-Group 2).



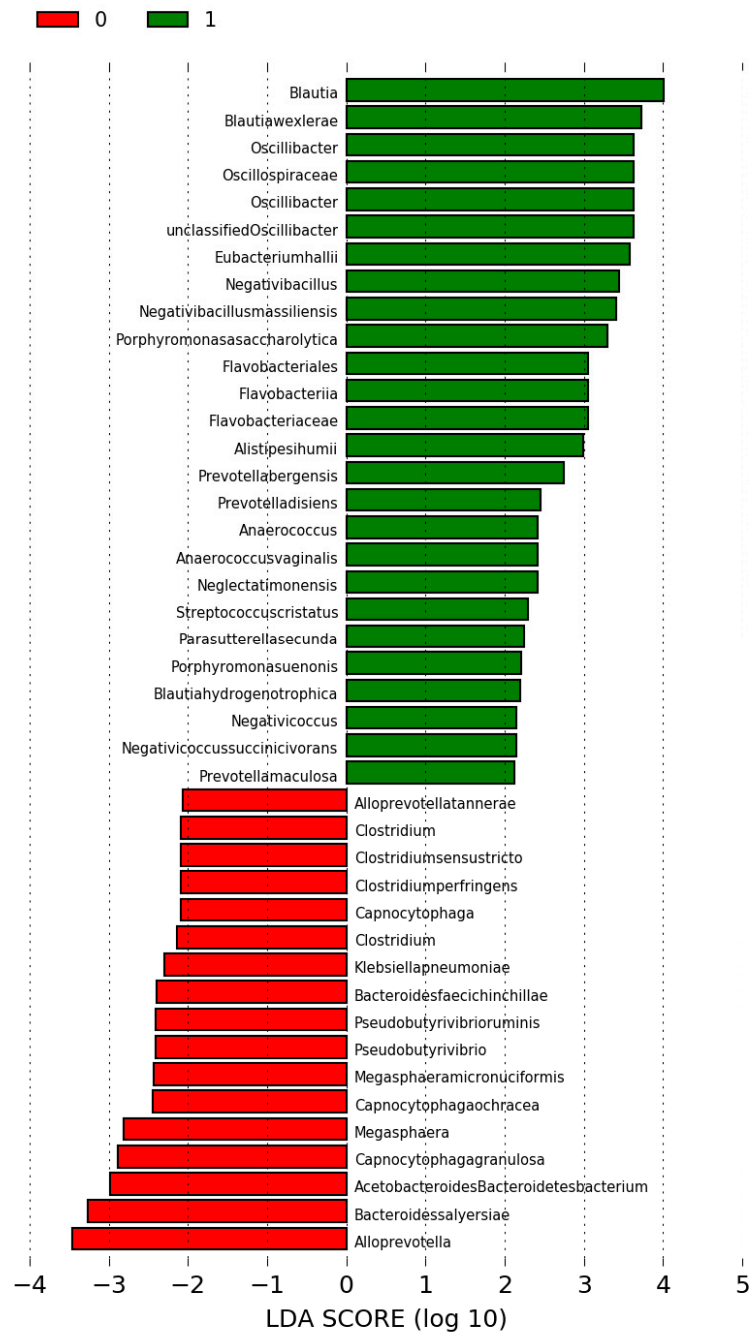

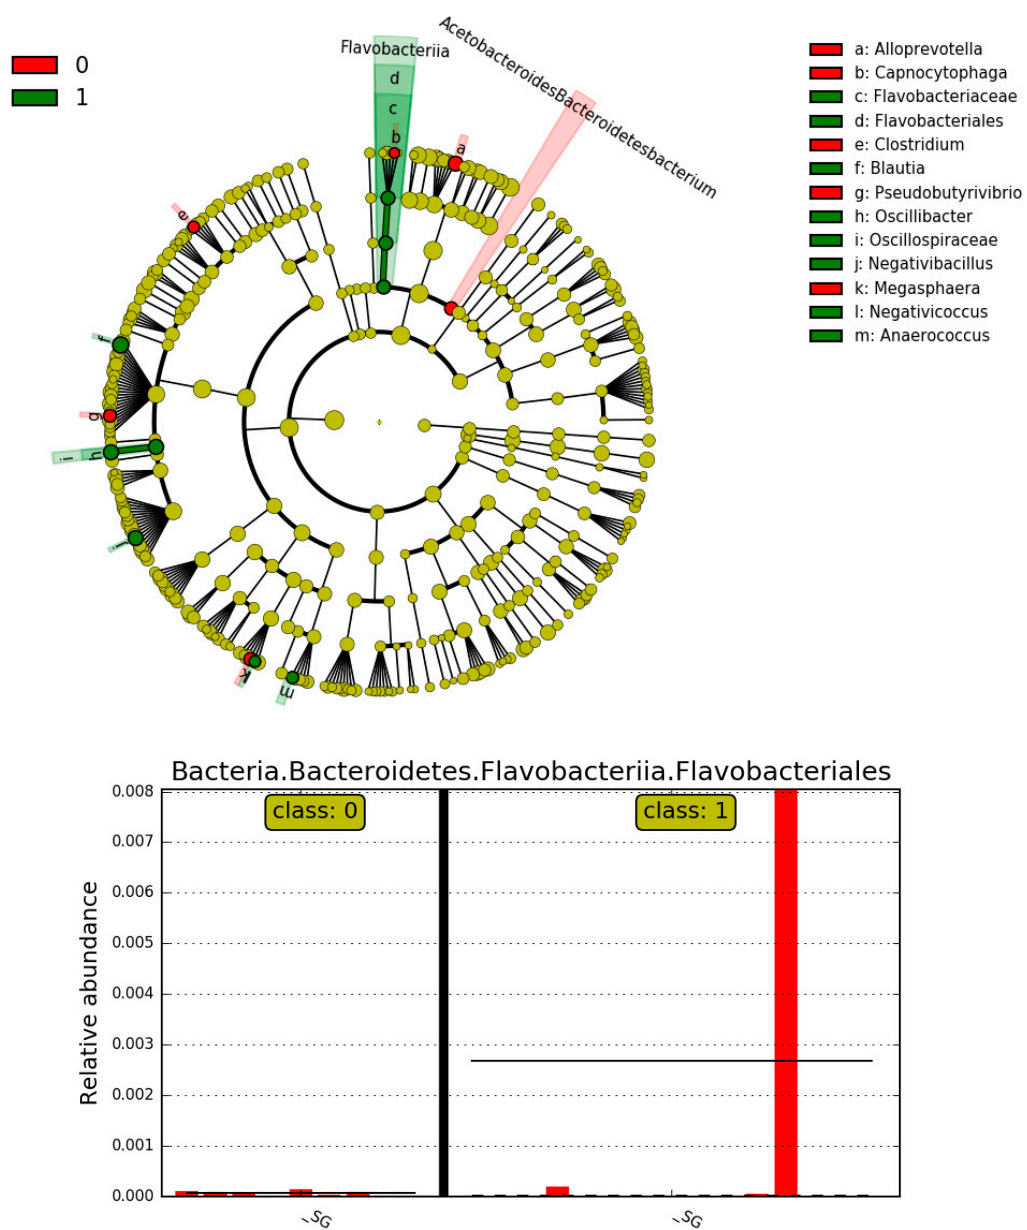

**Figure S6.** Differences in intestinal microbiota between Group 1 and Group 2 among patients undergoing SG (1-Group 1; 0-Group 2).

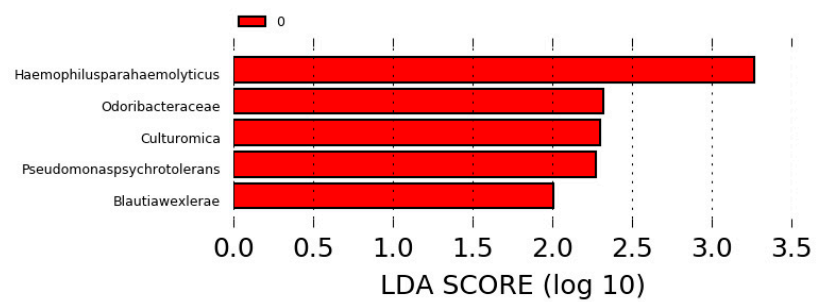

0

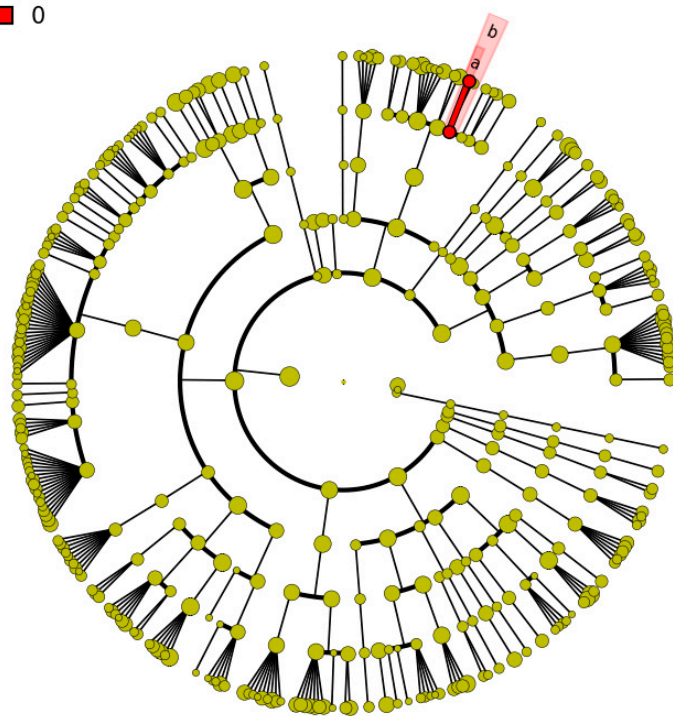

a: Culturomica  
b: Odoribacteraceae

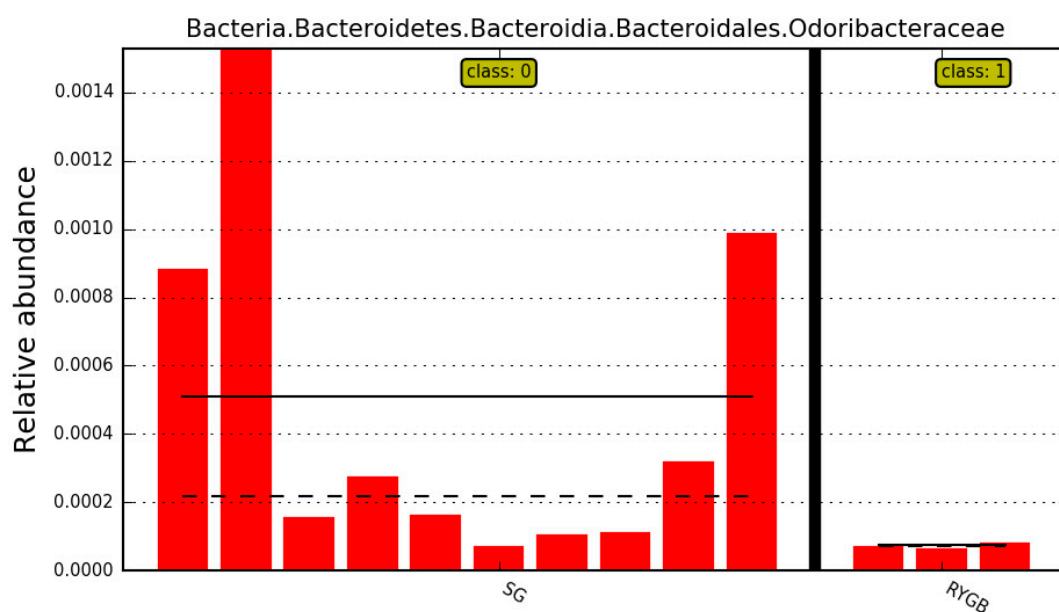

**Figure S7.** Differences in oral microbiota between Group 1 and Group 2 among patients undergoing RYGB (0-Group 1).

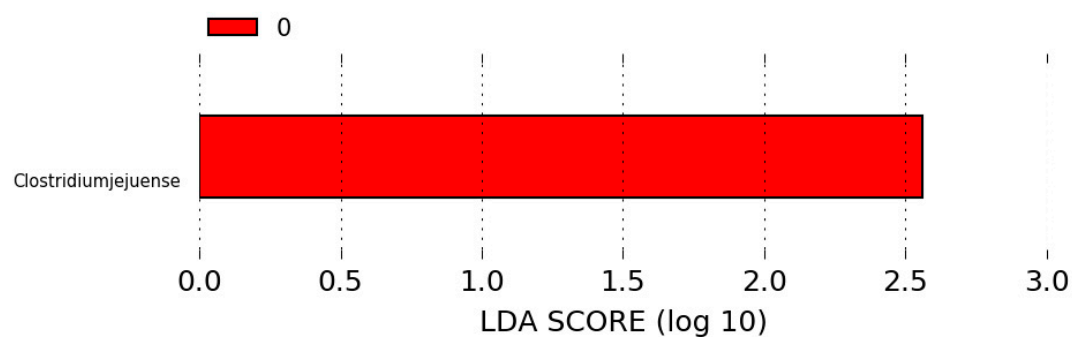

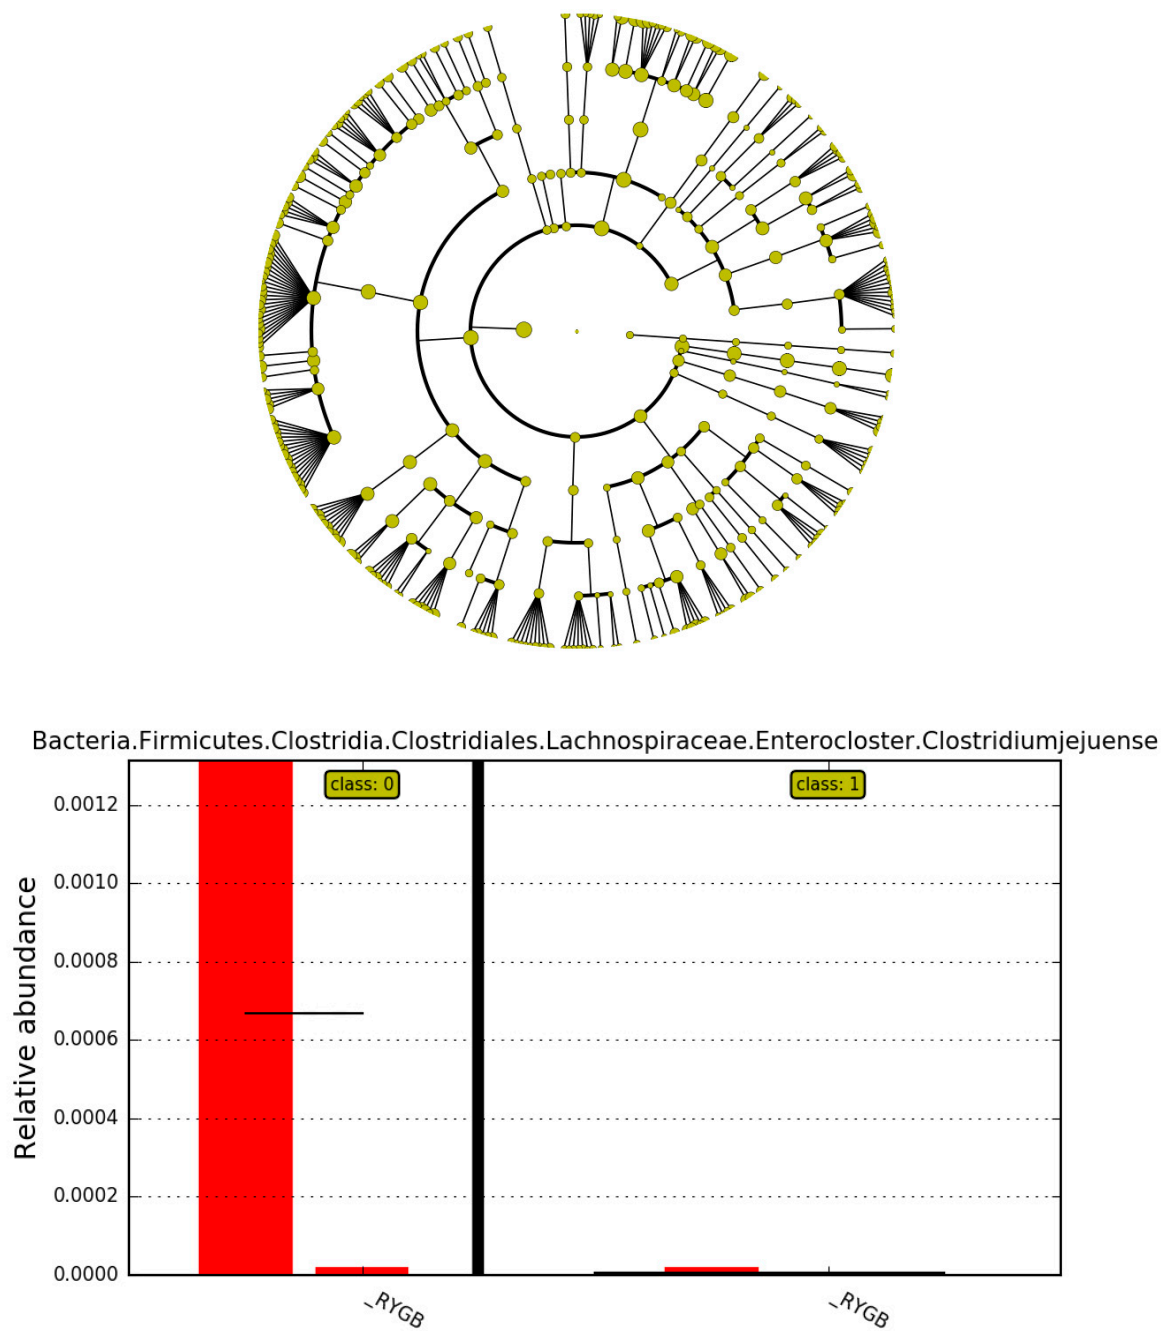

**Figure S8.** Differences in intestinal microbiota between Group 1 and Group 2 among patients undergoing RYGB (0-Group 1).
